# Supplementary material for: Lidocaine barbiturate: a promising material for second harmonic generation
Source: Royal Society of Chemistry journal article supplement (doi:10.1039/c3ce00059a), 2013-01-01
Supplement: c3ce00059a.pdf [file c3ce00059a.pdf]

# Electronic Supplementary Information

For

## Lidocaine barbiturate: a promising material for second harmonic generation

**Marlena Gryl,<sup>\*a</sup> Marcin Koziel<sup>a</sup>, Katarzyna Stadnicka<sup>a</sup>, Irena Matulková<sup>b</sup>,  
Ivan Němec<sup>b</sup>, Nad'a Tesařová<sup>c</sup>, Petr Němec<sup>c</sup>**

<sup>a</sup> Jagiellonian University, Faculty of Chemistry, Department of Crystal Chemistry and Crystal Physics, Ingardena 3, 30-060 Kraków, Poland. Email: gryl@chemia.uj.edu.pl

<sup>b</sup> Charles University in Prague, Faculty of Science, Department of Inorganic Chemistry, Hlavova 2030, 128 40 Prague 2, Czech Republic.

<sup>c</sup> Charles University in Prague, Faculty of Mathematics and Physics, Department of Chemical Physics and Optics, Ke Karlovu 3, 121 16 Prague 2, Czech Republic.

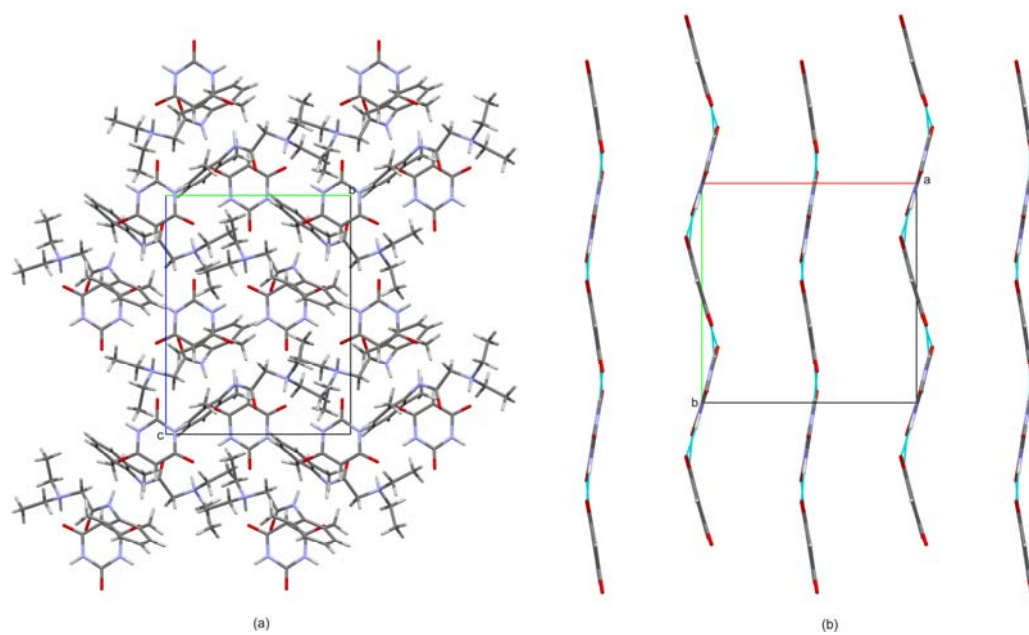

**Fig. S1** (a) Packing of the structure components viewed along **a**. (b) Side-shape of the tapes viewed along **c**. Both drawings were prepared in Mercury.

**Table S1** Hydrogen bond geometry for (I) (Å / °).

| D-H...A                     | d(D-H)  | d(H...A) | d(D...A) | <(DHA) |
|-----------------------------|---------|----------|----------|--------|
| N1A-H1A...O4A <sup>#1</sup> | 0.89(1) | 1.86(1)  | 2.745(2) | 172(2) |
| N3A-H3A...O6A <sup>#2</sup> | 0.89(1) | 1.86(1)  | 2.745(2) | 174(2) |
| N1B-H1B...O4B <sup>#3</sup> | 0.89(1) | 1.95(1)  | 2.833(2) | 174(2) |
| N3B-H3B...O6B <sup>#4</sup> | 0.89(1) | 1.93(1)  | 2.813(2) | 177(2) |
| N1-H1...O6A                 | 0.89(1) | 1.89(2)  | 2.697(2) | 151(2) |
| N3-H3...O6B <sup>#4</sup>   | 0.90(1) | 1.90(1)  | 2.792(2) | 177(2) |
| N2-H2...O4B                 | 0.90(1) | 1.90(1)  | 2.728(2) | 152(2) |
| N4-H4...O4A <sup>#5</sup>   | 0.89(1) | 1.91(1)  | 2.797(2) | 177(3) |

Symmetry transformations used to generate equivalent atoms: #1  $-x+1, y-1/2, -z+1$ ; #2  $-x+1, y+1/2, -z+1$ ; #3  $-x+2, y-1/2, -z+2$ ; #4  $-x+2, y+1/2, -z+2$ ; #5  $-x+1, y-1/2, -z+2$

**Table S2** Static first hyperpolarizability tensor components calculated for barbiturate (barb\_a, barb\_b) and lidocaine (lid\_a, lid\_b) non-optimised ions using B3LYP/6-31G(2d,2p) and B3LYP/6-311G(2d,2p).  $\beta_{\text{tot}}$  in  $10^{-30}$  esu units.

|                            | $\beta_{xxx}$ | $\beta_{xxy}$ | $\beta_{xyy}$ | $\beta_{yyy}$ | $\beta_{xxz}$ | $\beta_{xyz}$ | $\beta_{yyz}$ | $\beta_{xzz}$ | $\beta_{yzz}$ | $\beta_{zzz}$ | $\beta_{\text{tot}}^a$ |
|----------------------------|---------------|---------------|---------------|---------------|---------------|---------------|---------------|---------------|---------------|---------------|------------------------|
| <b>B3LYP/6-31G(2d,2p)</b>  |               |               |               |               |               |               |               |               |               |               |                        |
| barb_a                     | -97.74        | -143.28       | 79.55         | 31.50         | 6.34          | -3.35         | -2.39         | 1.65          | 0.41          | -0.09         | 0.97                   |
| barb_b                     | -91.29        | -148.00       | 78.32         | 33.62         | -0.32         | -2.44         | 0.33          | 2.85          | -0.63         | -0.18         | 1.00                   |
| lid_a                      | 379.40        | -28.51        | -28.42        | -24.40        | 41.17         | -22.67        | -12.63        | 59.74         | 12.07         | -37.88        | 3.57                   |
| lid_b                      | -454.07       | -5.00         | -46.44        | -61.22        | 57.68         | 0.73          | 6.62          | 26.92         | -1.21         | -18.35        | 4.15                   |
| <b>B3LYP/6-311G(2d,2p)</b> |               |               |               |               |               |               |               |               |               |               |                        |
| barb_a                     | -120.67       | -176.40       | 97.82         | 40.68         | 7.47          | -4.39         | -1.86         | 3.90          | 10.06         | -2.32         | 1.10                   |
| barb_b                     | -117.41       | -178.89       | 93.83         | 46.71         | 1.53          | -2.39         | 0.06          | 3.11          | 10.21         | 0.70          | 1.07                   |
| lid_a                      | 415.43        | -34.41        | -20.96        | -26.77        | 32.83         | -19.98        | -13.74        | 69.45         | 8.21          | -53.99        | 4.05                   |
| lid_b                      | -487.69       | -8.55         | -61.36        | -39.34        | 62.64         | -6.12         | -1.37         | 18.15         | 2.27          | -20.81        | 4.62                   |

<sup>a</sup>  $\beta_{\text{tot}} = \{(\beta_{xxx} + \beta_{xxy} + \beta_{xzz})^2 + (\beta_{yyy} + \beta_{yyz} + \beta_{yxx})^2 + (\beta_{zzz} + \beta_{zxx} + \beta_{zyy})^2\}^{1/2}$ .
